# Supplementary material
Source: HighWire-hosted journal article supplement (https://www.cmaj.ca/content/suppl/2015/08/24/cmaj.150391)

**Appendix 3 (as supplied by the authors):** Age-based algorithm for reducing vaccination pain in adolescents

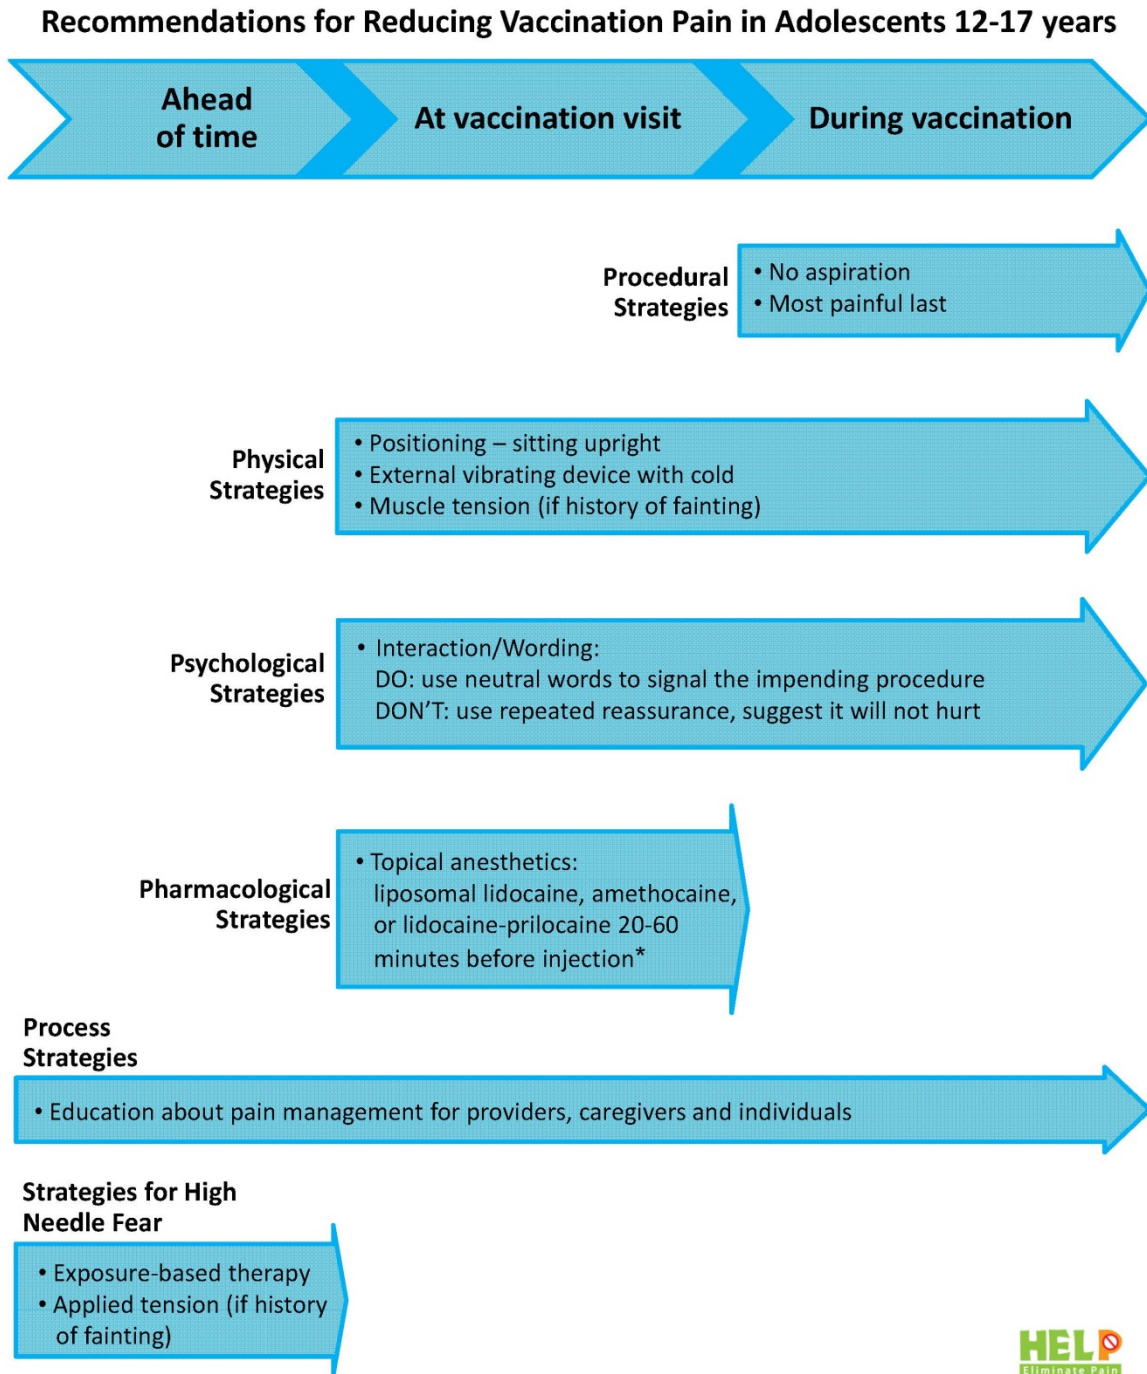

\* Check product monograph

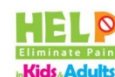

Supplement: 150391-guide-3-at.pdf [file 150391-guide-3-at.pdf]
